# Supplementary material for: A Randomized, Double-Blind, Placebo-Controlled Trial of Adjunctive Metformin Therapy in Overweight/Obese Youth with Type 1 Diabetes
Source: PLOS journal article supplement (doi:10.1371/journal.pone.0137525), 2015-09-14
Supplement: S3 (10.1371/journal.pone.0137525.s003) [file journal.pone.0137525.s003]

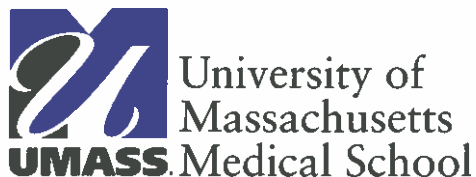

Human Subjects/IRB  
Office of the Vice Provost for Research  
University of Massachusetts Medical School  
55 Lake Avenue North  
Worcester, MA 01655-0002 USA  
508.856.4261 (office) 508.856.5004 (fax)

September 26, 2011

Benjamin Nwosu M.D.  
Pediatrics  
University Campus  
**RE: CHANGES IN PROTOCOL DOCKET 13938**

Dear Dr. Nwosu

The Committee for the Protection of Human Subjects in Research has approved the changes in your protocol entitled: Glycemic Control in Children and Adolescents with Double Diabetes: Trial of Optimized Insulin-Metformin Regimen

The changes requested are as follows:

Change subject population from 10~18 years to 10~20 years.

The revised consent form & new adult consent form, which you have submitted is satisfactory and approved copies, are enclosed.

**Please Note: Amendments that alter any of the drugs used in this research study must be forwarded to Lucie LaJeunesse, the research pharmacist.**

Thank you for your cooperation with the Committee.

Sincerely,

A handwritten signature in blue ink, appearing to read 'Michael Centola'.

Michael Centola MHS, CIP  
Manager, Institutional Review Board
